## **A nanobody-based fluorescent reporter reveals human $\alpha$ -synuclein in the cell cytosol**

Christoph Gerdes<sup>1</sup>, Natalia Waal<sup>2</sup>, Thomas Offner<sup>3,4</sup>, Eugenio F. Fornasiero<sup>1</sup>, Nora Wender<sup>1</sup>, Hannes Verbarq<sup>1</sup>, Ivan Manzini<sup>3,4</sup>, Claudia Trenkwalder<sup>5,6</sup>, Brit Mollenhauer<sup>6,7</sup>, Timo Strohäker<sup>8</sup>, Markus Zweckstetter<sup>8,9</sup>, Stefan Becker<sup>9</sup>, Silvio O. Rizzoli<sup>1</sup>, Buket Basmanav<sup>1,10,\*</sup>, Felipe Opazo<sup>1,2,\*</sup>

<sup>1</sup>Department of Neuro- and Sensory Physiology, University Medical Center Göttingen, D-37073 Göttingen, Germany

<sup>2</sup>Center for Biostructural Imaging of Neurodegeneration (BIN), University Medical Center Göttingen, D-37073 Göttingen, Germany

<sup>3</sup>Institute of Animal Physiology, Department of Animal Physiology and Molecular Biomedicine, Justus-Liebig University Giessen, 35390 Giessen, Germany.

<sup>4</sup>Institute of Neurophysiology and Cellular Biophysics, University of Göttingen, Göttingen, Germany

<sup>5</sup>Department of Neurosurgery, University Medical Center Göttingen, D-37075 Göttingen, Germany

<sup>6</sup>Paracelsus-Elena-Klinik, Klinikstraße 16, 34128 Kassel, Germany

<sup>7</sup>Department of Neurology, University Medical Center Göttingen, D-37075 Göttingen, Germany

<sup>8</sup>German Center for Neurodegenerative Diseases (DZNE), Von-Siebold-Str. 3a, 37075 Göttingen, Germany

<sup>9</sup>Department for NMR-based Structural Biology, Max Planck Institute for Biophysical Chemistry, Am Faßberg 11, 37077 Göttingen, Germany

<sup>10</sup>Campus Laboratory for Advanced Imaging, Microscopy and Spectroscopy, University of Göttingen, D-37073 Göttingen, Germany

\*Correspondence should be addressed to:

Buket Basmanav ([buketbasmanav@gmail.com](mailto:buketbasmanav@gmail.com))

Felipe Opazo\_ ([fopazo@gwdg.de](mailto:fopazo@gwdg.de))

## ABSTRACT

Aggregation and spreading of  $\alpha$ -Synuclein ( $\alpha$ Syn) are hallmarks of several neurodegenerative diseases, thus monitoring human  $\alpha$ Syn (h $\alpha$ Syn) in animal models or cell cultures is vital for the field. However, the detection of native h $\alpha$ Syn in such systems is challenging. We found that the nanobody NbSyn87, previously-described to bind h $\alpha$ Syn, also shows cross-reactivity for the proteasomal subunit Rpn10. As such, when the NbSyn87 is expressed in the absence of h $\alpha$ Syn, it is continuously degraded by the proteasome, while it is stabilized when it binds to h $\alpha$ Syn. Here, we exploited this feature to design a new Fluorescent Reporter for h $\alpha$ Syn (FluoReSyn) by coupling NbSyn87 to fluorescent proteins, which results in fluorescence signal fluctuations depending on the presence and amounts of intracellular h $\alpha$ Syn. We characterized this biosensor in cells and tissues, and finally, revealed the presence of transmittable  $\alpha$ Syn in human cerebrospinal fluid demonstrating the potential of FluoReSyn for clinical research and diagnostics.

## INTRODUCTION

$\alpha$ -synuclein ( $\alpha$ Syn) aggregation disorders including Parkinson's disease (PD), Lewy Body Dementia and Multiple System Atrophy, are a group of disorders characterized by the pathological occurrence of intracellular inclusions filled with insoluble aggregates of  $\alpha$ Syn. These aggregations can be found in various cell types and regions of the central nervous system<sup>1,2</sup>.  $\alpha$ Syn is a 140 amino acid long protein that is highly enriched in presynaptic nerve terminals<sup>3</sup>. Despite extensive efforts, the central molecular and physiological role of  $\alpha$ Syn remains to be determined. Emerging evidence however, suggests  $\alpha$ Syn to be involved in the regulation and possible maturation of synaptic vesicles<sup>4</sup> particularly via its role in the assembly of N-ethylmaleimide-sensitive factor attachment receptor (SNARE) complexes<sup>5</sup>; key players in synaptic vesicle docking and fusion with the presynaptic membrane. Additionally, other functions have been attributed to  $\alpha$ Syn including the regulation of glucose levels<sup>6</sup>, serving as an antioxidant<sup>7</sup> or a chaperone<sup>8</sup>, and suppressing apoptosis in dopaminergic neurons<sup>9</sup>.

Under normal physiological conditions,  $\alpha$ Syn is found as a monomeric protein existing in equilibrium between an intrinsically disordered form in the cytosol and a membrane bound,  $\alpha$ -helical form<sup>10</sup>. Although still subjected to debate<sup>11,12</sup>, observation of helical  $\alpha$ Syn tetramers has also been reported under certain native environments<sup>13</sup>.

It is widely accepted that arrangements of  $\alpha$ Syn monomers into small-to-intermediate oligomeric or larger insoluble assemblies<sup>14</sup> is associated with pathogenesis of  $\alpha$ Syn aggregation disorders<sup>15,16</sup>. Importantly, there is growing evidence for prion-like cell-to-cell transmission properties of different  $\alpha$ Syn conformations where 'toxic'  $\alpha$ Syn species with seeding properties are suggested to get internalized by a host cell and trigger the aggregation of endogenous  $\alpha$ Syn<sup>17-23</sup>. There are nevertheless several assumptions, unknown molecular steps and contradictory observations that render the toxic transmission of human  $\alpha$ Syn (h $\alpha$ Syn) an ambiguous notion. These mainly concern pinpointing of the disease underlying  $\alpha$ Syn species (e.g. oligomers vs fibrils, phosphorylated  $\alpha$ Syn, etc)<sup>24-26</sup>, mechanistic steps of the cell-to-cell transmission paradigm<sup>11,27</sup> and the downstream effects of pathological  $\alpha$ Syn accumulation that eventually lead to neuronal injury<sup>28,29</sup>.

Development of tools that can be used for reliable and reproducible detection and tracking of  $\alpha$ Syn in *in vitro* or *in vivo* is a very important goal for deciphering

molecular mechanisms of disease pathogenesis. A common strategy employed in studies addressing the cellular uptake, seeding and transmission phenomena involve manipulation of the  $\alpha$ Syn protein itself. Accordingly,  $\alpha$ Syn is either pre-labeled with fluorescent dyes<sup>18,30–32</sup>, or recombinantly expressed as a fusion protein. Concerning the latter, several different approaches are described which include tagging  $\alpha$ Syn with a small epitope tag (e.g. myc, V5, etc.) for subsequent antibody-mediated immunodetection<sup>18,33</sup>, expressing it as a fluorescent fusion protein (e.g. YFP- $\alpha$ Syn, DsRed- $\alpha$ Syn, etc.) for direct visualization<sup>34–36</sup> or employing the protein complementation assay principles whereby  $\alpha$ Syn is tagged with either N- or C-terminal portions of a split fluorescent or bioluminescent reporter<sup>37–40</sup>. Although they have proven to be very helpful in advancing the knowledge about synuclein-related pathologies, one common caveat in such approaches is their limited potential in recapitulating the natural behavior of untagged native  $\alpha$ Syn. For example, it has been shown that fluorescent protein fusions might result in the wrong localization of the studied protein<sup>41</sup> or some organic dyes have a propensity to bind to biological membranes<sup>42</sup>. Considering that a critical role is attributed to the lipid interacting properties of  $\alpha$ Syn in its pathological behavior<sup>43</sup>, the employment of untagged or native forms of  $\alpha$ Syn may be a more appropriate strategy when attempting to investigate the molecular mechanisms of  $\alpha$ Syn pathology. The detection of untagged, native or endogenous  $\alpha$ Syn in *in vitro* or *in vivo* model systems requires the use of other tools. Certain dyes such as Thioflavin S, derived from the histological dye Congo red, have been commonly utilized for detecting mature protein aggregates in *in vivo* models of  $\alpha$ Syn propagation and PD pathology<sup>19,44</sup>. However, these dyes have the disadvantage of binding any protein capable of taking an amyloid conformation and thus do not provide an exclusive labeling of  $\alpha$ Syn<sup>45</sup>. In contrast, antibody mediated immunodetection, is a conventional approach for specific detection of  $\alpha$ Syn. Hereby, a large number of  $\alpha$ Syn targeting antibodies, including conformation specific-ones and engineered antibody fragments are commonly utilized in a variety of applications<sup>46,47</sup>. In the recent years, camelid-originated single domain antibodies, also termed nanobodies, emerged as a promising alternative as they confer several advantages including recombinant production, enhanced tissue penetration, high stability, ideal for super-resolution microscopy and the ability to be expressed as intrabodies in mammalian cells<sup>48–50</sup>. The latter feature is particularly attractive as it confers the ability to track and manipulate specific target proteins in

living cells<sup>51,52</sup>. Nanobodies are increasingly being used for investigation of diseases associated with protein misfolding and aggregation. Recently, two nanobodies against  $\alpha$ Syn have been identified, NbSyn2<sup>53</sup> and NbSyn87<sup>54</sup>, each binding distinct epitopes at the C-terminal region of  $\alpha$ Syn. These have been biochemically well characterized and assessed for their potential therapeutic use by several studies<sup>53–60</sup>. In this study, we make use of a previously unknown feature of NbSyn87, namely its weak affinity to the 26S proteasomal subunit protein Rpn10, which is located at the entrance of the proteasome<sup>61</sup> and functions as a receptor for polyubiquitinated proteins that will undergo proteolysis. We discovered that this interaction is sufficient to drive a continuous proteasome-mediated degradation of intracellularly expressed NbSyn87 unless it is bound to h $\alpha$ Syn. The presence of h $\alpha$ Syn, on the other hand, results in the avoidance of the degradation of NbSyn87 by formation of a stabilized NbSyn87:h $\alpha$ Syn complex. Accordingly, we exploited this mechanism to create and characterize a nanobody-based Fluorescent Reporter for human  $\alpha$ Syn (FluoReSyn), that is able to report the presence or absence of cytosolic h $\alpha$ Syn. Our results demonstrate the unique ability of FluoReSyn to report small amounts of cytosolic h $\alpha$ Syn in cell lines and transduced primary rat hippocampal neurons. Expression of FluoReSyn in olfactory system of *Xenopus laevis* also showed its ability to operate and report h $\alpha$ Syn *in vivo*. Furthermore, cells stably expressing FluoReSyn (Reporter-cells) reported the presence of h $\alpha$ Syn in their cytosol after exposing them to human cerebrospinal fluid (CSF) samples. The results presented here indicate that this biosensor is a valuable instrument for studying the transmission of  $\alpha$ Syn and has great potential to be further optimized and validated as a diagnostic tool for  $\alpha$ Syn aggregation disorders.

## MATERIAL AND METHODS

### Plasmid transfections and virus infections

Transfections with pcDNA 3.1 (+) vectors (Thermo Fisher Scientific) encoding for hαSyn (accession number NM\_000345.4), human β-synuclein (hβSyn; accession number NM\_001001502.3) or rat αSyn (rαSyn; accession number NM\_019169.2) sequences were performed with Lipofectamine® 2000 (Invitrogen, Thermo Fisher Scientific) and Opti-MEM® I Reduced Serum Medium (Opti-MEM from Gibco, Thermo Fisher Scientific, Waltham, MA, USA) according to manufacturer's instructions. Transfected cells were typically used after 48 h. The adeno associated virus (AAV) coding for NbSyn87 fused to mCherry and nuclear localization signal (NLS) sequences (NbSyn87-mCherry-NLS) was kindly provided by Dr. Sebastian Kügler, Department of Neurology; Viral Vectors Laboratory, University Medical Center Göttingen, Germany.

### Protein purification

Rpn10, hαSyn, hβSyn were produced using NEB® Express Competent *E. coli* (New England BioLabs Inc., Ipswich, Massachusetts, USA). Bacteria were grown overnight with the plasmid of interest in Lysogeny Broth (Sigma-Aldrich) and the respective antibiotics. Next day, cells were further cultured in Terrific Broth (Sigma-Aldrich) and antibiotics until OD was ~2-3 at 37°C and induced with 0.8 mM IPTG for 4 h. After adding 5 mM EDTA, cells were harvested by centrifugation at 4,000 rpm for 30 min at 10°C and frozen at -20°C until further processing. Pellets were resuspended on ice with 1 mM DTT, 25 mM Imidazole and 1 mM PMSF in a His-binding buffer (50 mM HEPES pH 8.0, 500 mM NaCl, 5 mM MgCl<sub>2</sub> and 10% glycerol) and bacteria were lysed by sonication on ice. Cell debris was separated by centrifugation at 11,000 rpm for 1 h at 4°C. Clear supernatant was incubated with 2 ml of pre-equilibrated Ni-beads (cOmplete™ His-Tag Purification Resin, Roche, Switzerland) for 1 h and then transferred to a sigma column to be washed consecutively with His-binding buffer (50 mM HEPES pH 8.0, 1000 mM NaCl, 10 mM MgCl<sub>2</sub>, 25 mM Imidazole and 5% glycerol) and low-Salt-pH buffer (50 mM HEPES pH 7.5, 500 mM NaCl, 5 mM MgCl<sub>2</sub>, 25 mM Imidazole, 5% glycerol) with each of them containing 25 mM Imidazole. Finally, protein was eluted by 500 mM Imidazole and His-Tag was cleaved with SUMO protease and removed by reverse binding to nickel beads. Pure proteins were desalted into PBS, purity was confirmed by PAGE and concentrations were

determined using nanodrop spectrophotometer considering the protein molecular weight and extinction coefficient.

### **NbSyn87 coupling to Alexa647 fluorophore**

NbSyn87 protein was obtained from a custom production service offered by NanoTag Biotechnologies GmbH (Göttingen, Germany), and the nanobody was equipped with one ectopic cysteine at its C-terminal. 1 mg of pure NbSyn87 was reduced by adding TCEP (Sigma Aldrich) to a final concentration of 5 mM for 1 h on ice. The reduced sample was then desalted using gravity columns Nap10 (GE Healthcare Life Sciences) in nitrogen bubbled PBS (pH 7.4) and immediately added to 10 molar excess of maleimide-functionalized Alexa647 (Thermo Scientific) for 1 h on ice. Excess of free dye was separated from the conjugated nanobody with an Äkta HPLC equipped with a Superdex 75 increase column (GE Healthcare Life Sciences).

### **Generation of hαSyn fibrils**

hαSyn was expressed recombinantly in *E. coli* and purified as previously described<sup>62</sup>. Monomeric hαSyn in 50 mM HEPES, pH 7.4, 100 mM NaCl and 0.02% NaN<sub>3</sub> was centrifuged at 84.000 x g for 1 h at 4 °C. The supernatant was filtrated through 0.22 µm ULTRAFREE-MC centrifugal filter units (Millipore) and adjusted to 0.25 mM protein concentration. Aggregation was performed for 10 days at 37 °C with constant stirring at 200 rpm. Progress of fibril formation was monitored with a Thioflavin T fluorescence assay<sup>63</sup>. The fibrils were finally collected by ultracentrifugation at 20 °C, washed twice with 50 mM HEPES, pH 7.4, 100 mM NaCl and quantified by subtracting the amount of monomeric hαSyn in the supernatant from the total protein used for aggregation. Prior to their use, fibrils were resuspended in the washing buffer at 0.1 mM protein concentration.

### **Proteasome inhibition**

MG132 (Sigma-Aldrich, St. Louis, MO, USA) was administrated at different concentrations (Supplementary Figure 2) or at 1 µM to the culture medium for different time intervals (Figure 2).

### **CSF samples**

Study participants consisted of individuals who were in treatment at the Paracelsus Elena Klinik, Kassel, Germany and had been diagnosed with a variety of neurological



disorders non-related to  $\alpha$ Syn aggregation disorders. The study cohort consisted of 23 females and 19 male individuals with a mean age of  $70,95 \pm 1,51$ . For a detailed presentation of demographic and clinical features of participants please see Supplementary Table 1. CSF samples from all individuals were collected at the Paracelsus Elena Klinik in accordance with the principles of Declaration of Helsinki and following identical standard operating procedures. Briefly, CSF was collected by lumbar puncture in the morning with fasting patients in a sitting position. The samples were centrifuged at 2000 g for 10 min at room temperature (RT). Aliquots of the supernatants were frozen within 20-30 min and stored at  $-80^{\circ}\text{C}$  until their use. A total cell count was established in tube 1 (2 mL). Samples with erythrocyte counts greater than 50 cells per  $\mu\text{L}$  CSF in tube 1 were excluded from all analyses. The use of the CSF samples in this study was approved by the ethical committee of the Medical Center Göttingen with the approval numbers 36/7/02 and 9/7/04.

### **Cell lines**

Wildtype HEK293 were grown in DMEM supplemented with 10% FBS, 4 mM L-glutamine and 600 U/ml penicillin-streptomycin (Lonza). Reporter-cells (HEK293 stably expressing TetON-NbSyn87-EGFP-P2A-mCherry) and h $\alpha$ Syn-cells (HEK293 stably expressing TetON-h $\alpha$ Syn) were grown in DMEM supplemented with 10% FBS, 2 mM L-glutamine supplemented with 0.5  $\mu\text{g}/\text{ml}$  puromycin (InvivoGen, San Diego, CA, USA). Both, Reporter-cells and h $\alpha$ Syn-cells were produced by Sirion Biotech GmbH (Martinsried, Germany). TetON Induction was performed using 0.5  $\mu\text{g}/\text{ml}$  doxycycline (Sigma-Aldrich, St. Louis, MO, USA) at least 12 h before their use.

### **Primary hippocampal neurons**

The primary rat hippocampal neuron cultures were cultured with minor modifications from the original protocol<sup>64</sup>. Postnatal (P1-P2) pups from Wistar rats were decapitated and the brains were extracted. The hippocampi were isolated, washed in Hank's balanced salt solution (HBSS; Invitrogen, Darmstadt, Germany) and incubated in enzymatic digestion solution for 1 h at RT. After washing in HBSS the hippocampi were incubated in inactivation solution for 15 min. After another washing step in Neurobasal A, neurons were mechanically dissociated by pipetting. 15,000 neurons per well were added to the plating medium (MEM, 10% horse serum, 3.3 mM glucose, 2 mM glutamine) in PLL coated 96-multiple glass-bottom well plates



(SensoryPlate, Greiner Bio-One International GmbH, Kremsmünster, Austria) and kept at 37°C, 5% CO<sub>2</sub>. After ~1 h, when the neurons adhered to the glass bottom, the plating medium was exchanged with 100 µL Neurobasal A and plates were further cultured at 37°C, 5% CO<sub>2</sub>. To maintain healthy cultures, 50 µL of medium was removed every second day and replaced with 50 µL of fresh Neurobasal A. Five days after plating, neurons were infected with an AAV (8.8e5 TU AAV/5 µl) containing the sequence for NbSyn87 fused to mCherry and NLS sequences (NbSyn87-mCherry-NLS).

### **Cellular uptake of recombinant hαSyn from the culture medium**

Purified synuclein proteins were introduced to the medium of i) neurons cultured on 96-well plates 6 days post-infection with AAV NbSyn87-mCherry-NLS and ii) Reporter-cells cultured on 24-well plates 48 h (~70,000 cells per well) post-seeding. hαSyn (monomers or fibrils) and hβSyn proteins were diluted in Opti-MEM and incubated with Lipofectamine® RNAiMAX (Invitrogen, Thermo Fisher Scientific, 2 and 0.3 µl per well for Reporter-cells and neurons, respectively) for 20 min and then administered to the culture medium at a final concentration of 20 µM protein per well. Cells were fixed 14 h later for imaging and evaluation.

### **Detection of hαSyn species in CSF samples**

Wildtype HEK293 and Reporter-cells were seeded (~14,000 per well) and induced in a PLL-coated 96-well plate with glass bottom (SensoryPlate, Greiner Bio-One International GmbH, Kremsmünster, Austria). After 24 h of induction, the cells were exposed to CSF samples. Briefly, the medium was partially eliminated leaving 25 µl per well, and supplemented with 50 µl of CSF or culture medium as negative control. Cells were further incubated for 24 h and then fixed by adding 4% paraformaldehyde in PBS (137 mM NaCl, 2.7 mM KCl, 10 mM Na<sub>2</sub>HPO<sub>4</sub>, 2 mM KH<sub>2</sub>PO<sub>4</sub>; pH 7.4) overnight at 4°C, aldehyde groups were quenched with 0.1 M NH<sub>4</sub>Cl for 15 min and images were acquired.

### **Immunostaining**

Cells were briefly washed with DPBS (Reporter-cells) or Tyrode buffer (primary rat hippocampal neurons), fixed with 4% paraformaldehyde in PBS for 30 min at RT. Remaining reactive aldehyde groups were quenched in PBS supplemented with 0.1 M glycine and 0.1 M NH<sub>4</sub>Cl for 15 min at RT. Cells were permeabilized and

unspecific protein binding sites were blocked with a blocking/permeabilization solution (0.1% Triton® X-100 and 2% bovine serum albumin, BSA in PBS) at RT for 15 min. Reporter-cells were incubated with a rabbit polyclonal anti- $\alpha/\beta$ -Synuclein antibody (dilution 1:500; Cat. No. 128002, SySy, Göttingen, Germany) and neurons with a polyclonal guinea pig anti-synaptophysin antibody (dilution 1:100 Cat. No. 101004, SySy, Göttingen, Germany) for 1 h. After three thorough washing steps, cells were incubated with the secondary antibodies (donkey anti-rabbit, dilution 1:500; Cat. No. 711-175-152, Dianova, Hamburg, Germany or donkey anti-guinea pig IgG labeled with ATTO 647N, dilution 1:500; Cat. No. N0602-At647N-S, SySy, Göttingen, Germany) for 45 min or 1 h, respectively. The samples were again subjected to three thorough washing steps with PBS and high-salt PBS (500 mM NaCl, 2.7 mM KCl, 10 mM Na<sub>2</sub>PO<sub>4</sub>, 2 mM KH<sub>2</sub>PO<sub>4</sub>; pH 7.3-7.4). Before mounting the coverslips or before imaging, cells were stained with Höchst 33342 (1  $\mu$ g/ml; Thermo Fisher Scientific). Coverslips were finally mounted in Mowiol mounting media (6 g glycerol, 6 ml deionized water, 12 ml 0.2 M Tris buffer pH 8.5, 2.4 g Mowiol® 4-88 from Merck). 96-well plates were imaged in PBS.

### **Plasmid electroporation of *Xenopus laevis* tadpoles**

All procedures for animal handling were approved by the governmental animal care and use office (Niedersächsisches Landesamt für Verbraucherschutz und Lebensmittelsicherheit, Oldenburg, Germany, Az.12/0779) and were in accordance with the German Animal Welfare Act as well as with the guidelines of the Göttingen University Committee for Ethics in Animal Experimentation.

*Xenopus laevis* tadpoles (albinos, stage 53 according to Nieuwkoop and Faber, 1994<sup>65</sup>) were used for the *in vivo* experiments. Injection micropipettes were pulled from borosilicate microcapillaries (Warner instruments; outer diameter: 1.0 mm, inner diameter: 0.58 mm, length 100 mm) using a horizontal puller (P 1000, Sutter Instruments). Micropipette tips were sharpened at an angle of 20-30° until the pipette tip had a syringe-like shape (Micropipette Beveler 48000; World Precision Instruments). Micropipettes were filled with 3  $\mu$ l of plasmid solution/s (600 ng/ $\mu$ l). Cascade blue dextran (3 mM, 10%, Thermo Fisher) was added to the plasmid solution before to be able to observe dye extrusion under fluorescent illumination. Albino tadpoles were anaesthetized in 0,02% MS-222 (ethyl 3-aminobenzoate methanesulfonate; Sigma-Aldrich; pH: 7.6) for 5 min until complete immobility and

irresponsiveness. Subsequently, the animal was transferred to a moistened dish under a stereomicroscope with brightfield and fluorescent illumination (Olympus SZX16; light source: X-Cite Series 120 Q, Lumen dynamics). The glass pipettes filled with plasmid solution/s were mounted to a micromanipulator connected to a FemtoJet injection system (Eppendorf). The micropipette was carefully penetrated into the olfactory mucosa at three to five different locations without injuring major arteries. Up to five pressure pulses of 250 to 1000 hPa (1 s each) were applied per site. Once homogenous blue fluorescent signal was visible throughout the olfactory mucosa, an external electric field was applied to the olfactory mucosa using an electroporation setup as previously described in detail<sup>66</sup>. One of the 0.2 mm platinum wire electrodes was positioned in the water-filled nostril, the other one in contact to the skin, laterally to the olfactory nerve. Trains of 3 square pulses (20 V, 500 ms duration and 25 ms delay) were applied four times in alternating polarity (ELP-01D, NPI Electronics; additional capacitor connected in parallel: Domoport, 3  $\mu$ F). The entire procedure was performed in less than 5 min to grant proper anesthesia and avoid dissipation of plasmid solution before electroporation. Following electroporation, animals were put into water until they woke from anesthesia. After assessment of normal swimming the larvae were left in their aquaria to recover for at least 24 h. Individual nostrils were electroporated sequentially, with a 1 h recovery period in between. We injected and electroporated two plasmids in the left nostril: one expressing FluoReSyn and the other  $\text{h}\alpha$ Syn, both under the CMV promotor. In the right nostril, only the FluoReSyn-expressing plasmid was electroporated.

## Imaging

Conventional epifluorescence images of the Reporter-cells were obtained with an Olympus IX71 microscope equipped with a 0.5 NA/20x dry UPlanFL N objective and captured with an Olympus F-View II CCD camera (Olympus, Hamburg, Germany). Experiments with CSF samples and neurons on 96-well plates were acquired using a Biotek Cytation 3 Imaging Reader (BioTek Instruments, Winooski, VT, USA) equipped with a 20x, Plan Fluorite WD 6.6 NA 0.45 objective, a 465 nm LED cube (Cat# 1225001), EGFP Filter cube (Cat# 1225101), 523 nm LED cube (Cat# 1225003), RFP filter cube (Cat# 1225103) and a 16-bit monochromatic CCD-camera (pixel size 6.45  $\mu$ m x 6.45  $\mu$ m).

### ***In vivo* multiphoton imaging of the *Xenopus* olfactory system**

For *in vivo* imaging, we anesthetized the electroporated tadpoles in 0,02% MS-222 (ethyl 3-aminobenzoate methanesulfonate; Sigma-Aldrich; pH: 7.6) for 5 min until complete irresponsiveness. The animals were placed into a recess of a silicone-filled recording chamber. The chamber was filled with water and the animal was mechanically fixed using parafilm. A small window was cut into the parafilm to expose the olfactory organs. Both nostrils were imaged under a two-photon microscope (Nikon A1R MP) at an excitation wavelength of 920 nm. All animals (n=9) and nostrils were imaged as 3D image stacks under the same gain and laser settings, to compare fluorescence intensities of the FluoReSyn. The imaging procedure did not last longer than 10 min and animals were transferred to a big water filled beaker until they recovered from anesthesia.

### **Cell lysate preparation**

Reporter-cells were washed briefly with ice-cold DPBS and lysed with 50  $\mu$ l of lysis buffer per well (50 mM Tris/HCl pH 7.5, 150 mM NaCl, 2 mM EDTA, 0.5% IgePAL, 0.5% Sodium deoxycholate and freshly added 250  $\mu$ M PMSF, 10 ng Leupeptin, 10 ng Aprotinin, 1 ng Pepstatin A, 10 ng DNase und 1  $\mu$ l Halt® Protease Inhibitor Cocktail; Thermo Fisher Scientific). Cell lysates were collected into a pre-cooled tube and were centrifuged for at least 1 h at 13,200 rpm at 4°C. The supernatant was collected into two tubes, snap-frozen with liquid nitrogen and stored at -80°C until needed.

### **Western blotting**

Reporter-cell lysates were thawed on ice and diluted accordingly to their total protein (determined using BCA assay (Merk)) to load the same total protein concentration in each lane. Samples were mixed with pre-heated 5x Laemmli buffer (50 mM Tris-HCl, 4% sodium doedecyl sulfate (SDS), 0.01% Serva Blue G, 12% glycerol, pH 6.8, 50 mM DTT) to be further boiled at 95°C for 10 min, centrifuged and then loaded into previously casted 10-12% polyacrylamide gels (PAGE). After the SDS-PAGE run was completed, proteins were transferred to a nitrocellulose membrane in wet trans blot cell (Biorad) with 400 mA for 2 h at 4°C while stirring the transfer buffer (25 mM Tris, 192 mM glycine, pH 8.3 and 20% methanol and 0.04% SDS). The membrane was incubated for 1 h in blocking buffer (5% Nonfat Dried Milk, 0.1% Tween®20 in

PBS) and then was further incubated with a mouse polyclonal anti-EGFP antibody (1:500; Cat. No. A11120, Invitrogen, Thermo Fisher Scientific) or a rabbit polyclonal anti- $\beta$ -Actin-Cy5 antibody (1:1000; Cat. No. 251003, SySy, Göttingen, Germany). Primary antibody incubations were performed overnight at 4°C with constant shaking. The following day, the membrane was washed thoroughly in blocking buffer and incubated with the fluorescently labeled secondary donkey polyclonal anti-mouse antibody (1:1000; Cat. No. 715-175-150, Dianova) for 1 h at RT. For experiments with the directly labeled anti- $\beta$ -Actin antibody, the second 1 h incubation step was omitted. Membrane was washed several times each in 0.1% Tween®20 in PBS and imaged using an Amersham Imager 600 (GE Healthcare Life Sciences, Little Chalfont, UK).

### **Dot-Blot**

Proteins were serially diluted in washing buffer (0.05% Tween®20 in PBS) and spotted on a nitrocellulose membrane. After the membrane was dried, it was blocked with 2% FBS or BSA, 5% Nonfat Dried Milk, 0.05% Tween®20 in PBS for 1 h under agitation. This was followed by incubation with the fluorescently-labeled nanobody NbSyn87-Alexa647 for 1 h. Unbound nanobodies were washed away by several thorough washing steps with 0.05% Tween®20 in PBS for a total duration of 1 h. Finally, images of the membranes were taken with an Amersham Imager 600 (GE Healthcare Life Sciences, Little Chalfont, UK) to detect the NbSyn87-Alexa647 signal.

### **Data analysis and statistics**

Image analyses of experiments presented in Figures 1, 2, 4-7, and Supplementary Figures were performed with custom-written procedures in Matlab (MathWorks Inc., Natick, Massachusetts, USA). Cells were identified automatically based on their Höchst 33342 (Figures 1, 2, 4-6, Supplementary Figures) or mCherry (Figure 7) signals. The average signal intensity within a cell was calculated and corrected for the background intensity by subtracting the background region of interest from the average signal intensity.

Cells were considered as positive if their background-corrected GFP (Figures 1, 4, 5, Supplementary Figures 3-4) or mCherry (Figure 6) signal intensity (AU) was above the mean plus 2 standard deviations of control GFP or mCherry signal intensity,

respectively. For figure 7, cells were considered as positive if background-corrected GFP signal intensity was above 400 AU. In Figure 7, signal intensity was normalized to mCherry to exclude differences in FluoReSyn induction.

Graph plotting as well as statistical analyses of data presented in Figures 1, 2, 4-7 and Supplementary figures were carried out using custom-written procedures in Matlab, Sigma Plot (Systat Software, San Jose, CA, USA) or GraphPad Prism 5.0 (San Diego, CA, USA). All values are given as mean  $\pm$  standard error of the mean (SEM) from 3 independent experiments. Statistical significance was assessed by One-Way ANOVA and Tukey's Post-hoc test.

Images showing FluoReSyn signal *in vivo* (Figure 3) were created from multi-channel 3D image stacks acquired with the multiphoton microscope. Autofluorescence from melanophores was removed by subtracting the maximum intensity z-projections of the blue emission channel (where only autofluorescence was visible) from the green emission channel (with FluoReSyn signal only) using Fiji 'Image Calculator' function<sup>67</sup>. For quantitative analysis of differences in FluoReSyn fluorescence between nostrils, maximum intensity z-projections of the green emission channel were processed in Fiji to obtain a binary mask of the regions of interest (nuclei with FluoReSyn signal). Therefore, binary images were created using Li's method of minimum cross-entropy thresholding<sup>68</sup> followed by four rounds of despeckeling in Fiji<sup>67</sup>. The resulting binary masks were used to measure mean fluorescence intensity values of all regions of interest in the images with areas between 20 to 150 px (size range of nuclei). Fluorescence mean intensities were pooled for each condition (FluoReSyn + hαSyn vs. only FluoReSyn) from 9 (559 nuclei in total) animals measured under the same conditions. Scatter plots were created using the Seaborn package in Python (python.org; version 0.9; 10.5281/zenodo.1313201).

## RESULTS

### Reporting the presence of untagged hαSyn in the cellular cytosol

We had previously observed in cells transiently expressing the NbSyn87<sup>54</sup> fused to EGFP that their fluorescent signal correlated with the presence or absence of hαSyn (Figure 1a). In an attempt to comprehend this observation, we used the Basic Local Alignment Research Tool (BLAST<sup>69</sup>) to find out if the described hαSyn epitope sequence (VDPDNEAYEMPS<sup>54</sup>) that is recognized by the NbSyn87 might be present in another endogenous protein. The BLAST result showed a high % identity (Figure



1b) to a subunit of the 26S proteasome (the 26S proteasome non-ATPase regulatory subunit 4 homolog, also known as Rpn10). This protein resides at the entrance of the 26S proteasome<sup>61</sup> and plays an important role in the recognition of poly-ubiquitinated proteins that will be processed in the ubiquitin proteasome-mediated proteolysis (UPP)<sup>70</sup>. Using a dot-blot assay with purified Rpn10 and hαSyn, we were able to verify that the NbSyn87 can bind weakly to human Rpn10 (Supplementary Figure 1a, b). Therefore, taking our results together, we hypothesized that the degradation of NbSyn87 in the absence of hαSyn may be mediated by its weak but continuous recruitment to the proteasome upon binding the endogenous Rpn10 (Figure 1c).

In order to test our hypothesis and further characterize NbSyn87 in terms of this special feature, we decided to generate a stable cell line expressing NbSyn87 fused to EGFP and have mCherry signal as an expression reporter using the self-cleavable domain T2A<sup>71</sup> (Figure 1d). In addition, we added a NLS sequence at the C-terminus of NbSyn87-EGFP to concentrate the EGFP signal in the nucleus and gain sensitivity during imaging. The expression of this protein-chimera was controlled under the tetracycline-inducible promoter system (TetOn). Optimal induction duration to maximize the NbSyn87-EGFP-NLS expression was determined by analyzing the mCherry reporter signal (Supplementary Figure 1c). In line with our original observations, we detected a clear nuclear EGFP signal in doxycycline-induced NbSyn87-EGFP-NLS stable cell line when we transiently transfected them with wild type and untagged hαSyn (Figure 1d). The strength of this effect was dependent on the amount of hαSyn present in the cells; detected both by EGFP fluorescence signal intensity analysis (Figure 1e) and EGFP amounts revealed in Western blots (Figure 1f and Supplementary Figure 1d). Doxycycline-induced cells that were not transiently transfected with hαSyn displayed the mCherry reporter signal but no EGFP signal (Figure 1d). Therefore, we termed the NbSyn87-EGFP-NLS construct as the Fluorescent Reporter for αSyn (FluoReSyn) and the stably FluoReSyn expressing cell line as the Reporter-cells.



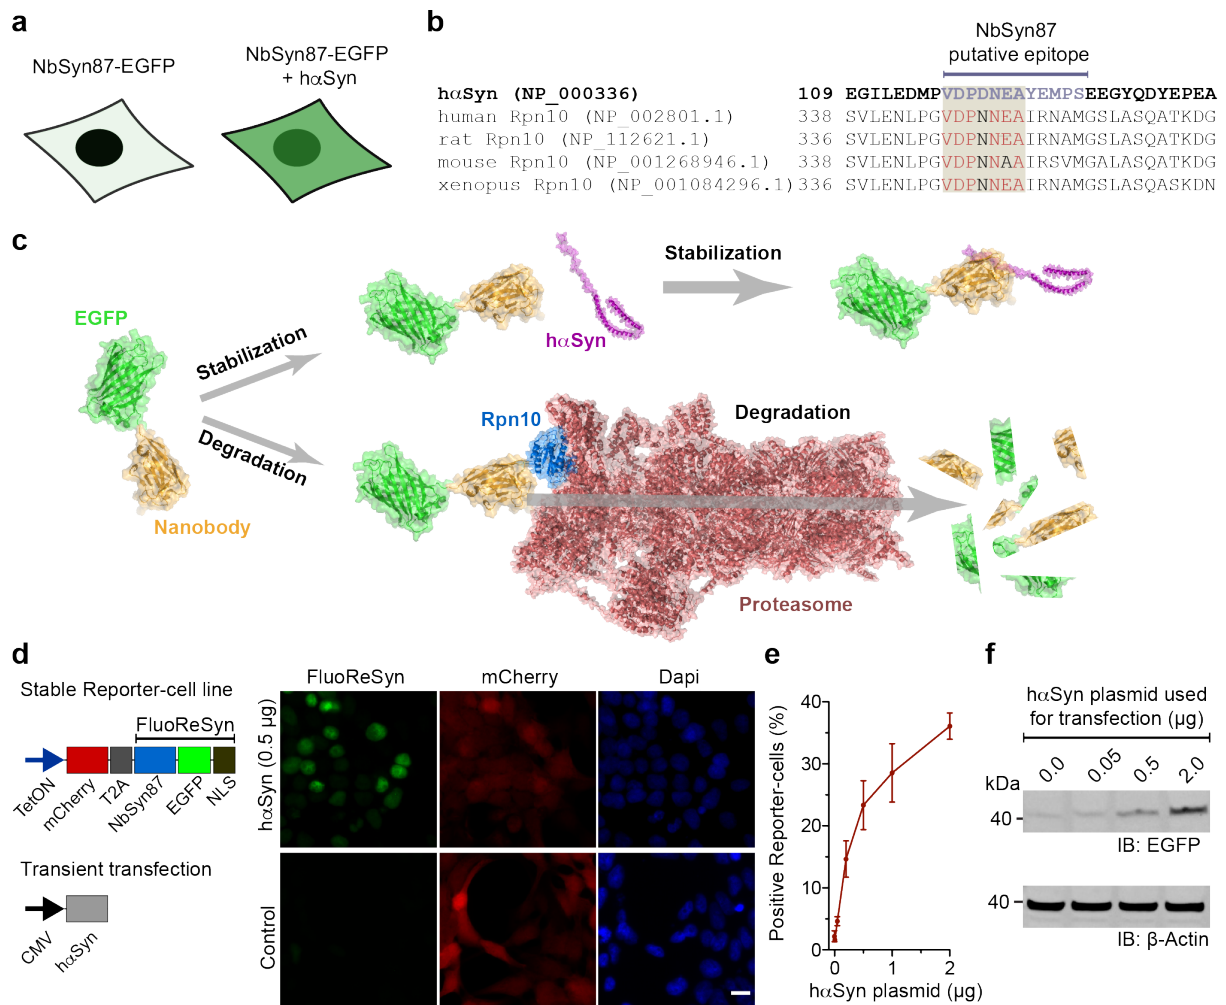

**Figure 1. αSyn dependent accumulation of FluoReSyn in HEK293 cells.** (a) Schematic representation of the initial observation of cells transiently expressing NbSyn87-EGFP alone (left) or together with hαSyn (right). While the former group of cells showed minimal fluorescence, the latter presented with a strong EGFP signal. (b) Alignment of the amino acid sequence from hαSyn and Rpn10 across different species. Rpn10 residues similar to hαSyn in the putative epitope are displayed in red. (c) Schematic representation of the proposed mechanism of degradation versus stabilization of SynNb87-EGFP in the presence or absence of hαSyn. The following Protein Data Bank (PDB) accession numbers were used and modified to assemble the schematic: 2Y0G (EGFP), 2X6M (Nanobody), 1XQ8 (hαSyn), 6MSK (Proteasome). (d) Schemes of constructs used to transfect HEK293 cells (left). For the stably transfected cells, a tetracycline inducible promoter (TetON) was used, followed by a mCherry reporter sequence, a cleavable T2A sequence, and FluoReSyn made of NbSyn87, EGFP and a NLS sequence. Transient expression of untagged wildtype human hαSyn was driven by a plasmid containing a cytomegalovirus (CMV) promoter. Equally scaled, representative images of doxycycline induced Reporter-cells (right). Cells were either mock transfected (control) or transiently transfected with the hαSyn expression constructs. (e) Quantitative analysis of EGFP-positive cells transfected with variable quantities of hαSyn plasmid. Per replication and condition more than 1,000 cells were analyzed. (f) Western blot analysis of lysates from Reporter-cells transfected with variable quantities of hαSyn. Immunoblotted (IB) anti-EGFP represents FluoReSyn. Loading control is IB Beta-Actin. Full length blots are displayed in Supplementary Figure 1d.

### **Proteasome-mediated degradation of FluoReSyn in the absence of $\alpha$ Syn**

In order to validate our proposed mechanism for the degradation of FluoReSyn, we treated doxycycline-induced Reporter-cells (without expressing h $\alpha$ Syn) over different time periods with the MG132 proteasome inhibitor. MG132 concentration was optimized to provide a strong gain of EGFP and mCherry signal while minimizing its adverse toxic effects on the Reporter-cells (Supplementary Figure 2). The results clearly showed that, following treatment with 1  $\mu$ M of MG132, FluoReSyn started to accumulate in the nuclei of Reporter-cells already from the 4<sup>th</sup> h on without the presence of h $\alpha$ Syn (Figure 2a, b). Induced Reporter-cells untreated with MG132, showed in contrast virtually no FluoReSyn signal throughout the whole duration (Figure 2a, b). These suggested that the reporter is regularly produced but also continuously degraded via the proteasome in the cell (fast turnover) under normal conditions. The mCherry and FluoReSyn are produced from a single mRNA, making a fusion protein that is efficiently cleaved at the T2A domain<sup>71</sup>. It is expected that this strategy results in stoichiometric amounts of FluoReSyn and mCherry, which allowed us to normalize the signal of FluoReSyn with the mCherry signal. In induced Reporter-cells untreated with MG132, the relation of FluoReSyn to mCherry signal was maintained during the 16 h experiments (Figure 2c). However, when using MG132, already after 2 h, the ratio between FluoReSyn signal and mCherry doubled and kept growing over time, showing that the accumulation of FluoReSyn exceeds that of mCherry and that the former gets particularly enriched in the Reporter-cells when the proteasome machinery is inhibited (Figure 2c). This observation suggests that the proteasomal degradation is particularly accelerated for FluoReSyn under normal conditions (uninhibited proteasome machinery), and thus substantiates our proposition that the nanobody NbSyn87 specifically targets the proteasome and is degraded by it.

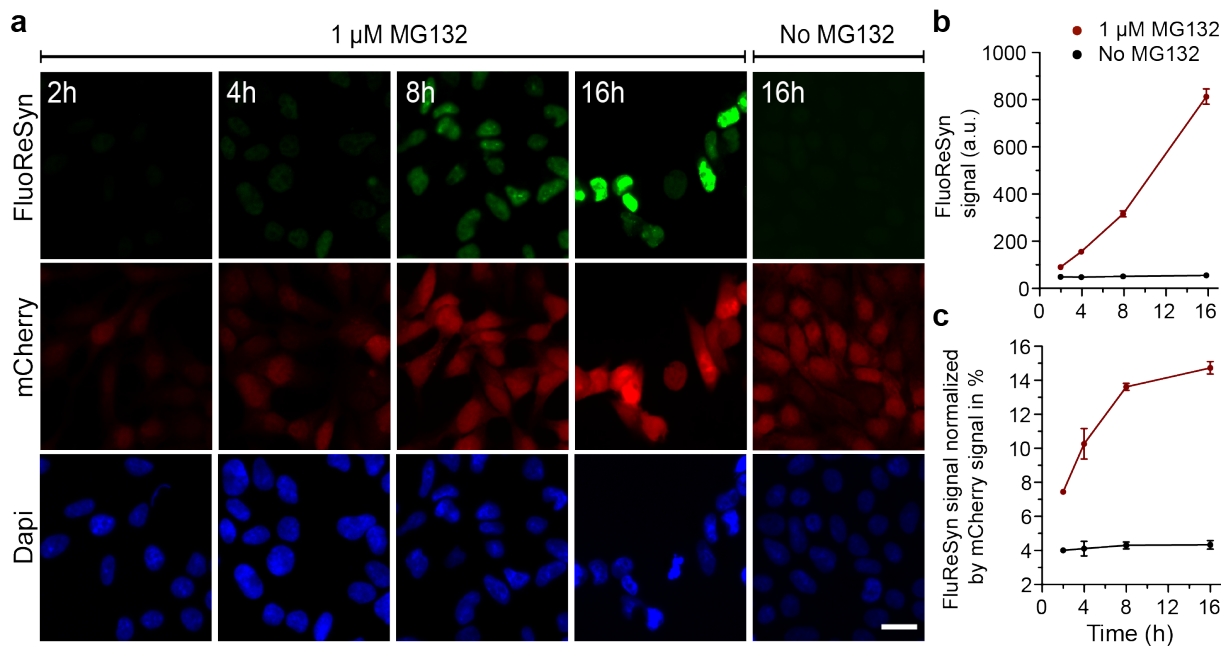

**Figure 2. The FluoReSyn is rapidly degraded by the proteasome machinery. (a)** Equally-scaled, representative epifluorescence images of MG132 treated and untreated Reporter-cells which were fixed 2, 4, 8 or 16 h post-treatment. The FluoReSyn accumulates in response to prolonged MG132 treatment of Reporter-cells as revealed by the increasing nuclear EGFP intensity. Reporter-cells untreated with MG132 yielded virtually no EGFP signal even after 16 h **(b)** Quantitative analyses of FluoReSyn signal (EGFP) when Reporter-cells were treated or untreated with MG132. Per replication and condition more than 540 cells were analyzed. **(c)** FluoReSyn signal normalized by mCherry signal (EGFP to mCherry signal intensity).

### FluoReSyn reports h $\alpha$ Syn *in vivo*

As Rpn10 is a well conserved protein across different species (Figure 1b), we presumed that our proposed mechanism should also operate in a model organism that lacks endogenous h $\alpha$ Syn and possesses the conserved Rpn10 epitope recognized by NbSyn87. Accordingly, we chose to validate the proposed mechanism in living *Xenopus laevis* tadpoles, a time- and cost efficient model organism<sup>72</sup>. *Xenopus laevis* expresses endogenously the same Rpn10 epitope needed for FluoReSyn to operate and offers a straightforward electroporation-mediated approach for gene delivery to the olfactory receptor neurons in the olfactory epithelium of living animals<sup>73</sup> (Figure 3a, b). Accordingly, the plasmid encoding for FluoReSyn was electroporated either alone or together with a plasmid encoding for h $\alpha$ Syn fused to mCherry into the right or left nostrils of anesthetized tadpoles, respectively. By *in vivo* imaging of tadpoles with 2-photon microscopy we observed many GFP-positive nuclei co-localizing with the mCherry signal (h $\alpha$ Syn) in the left nostrils of the animals (Figure 3c, e, g, high magnification example on 3j) which was

clearly in contrast with the right nostrils presenting seldom any GFP-positive nucleus (Figure 3d, f, h). Analysis of the distribution of GFP fluorescence intensity further confirmed the clear distinction between left and right nostrils (Figure 3i). Altogether, this data further validated our previous conclusions by demonstrating that the same mechanism seems to be operational *in vivo* whereby FluoReSyn is stabilized upon h $\alpha$ Syn binding and cleared from the cell by proteasome-mediated degradation in the absence of this interaction.

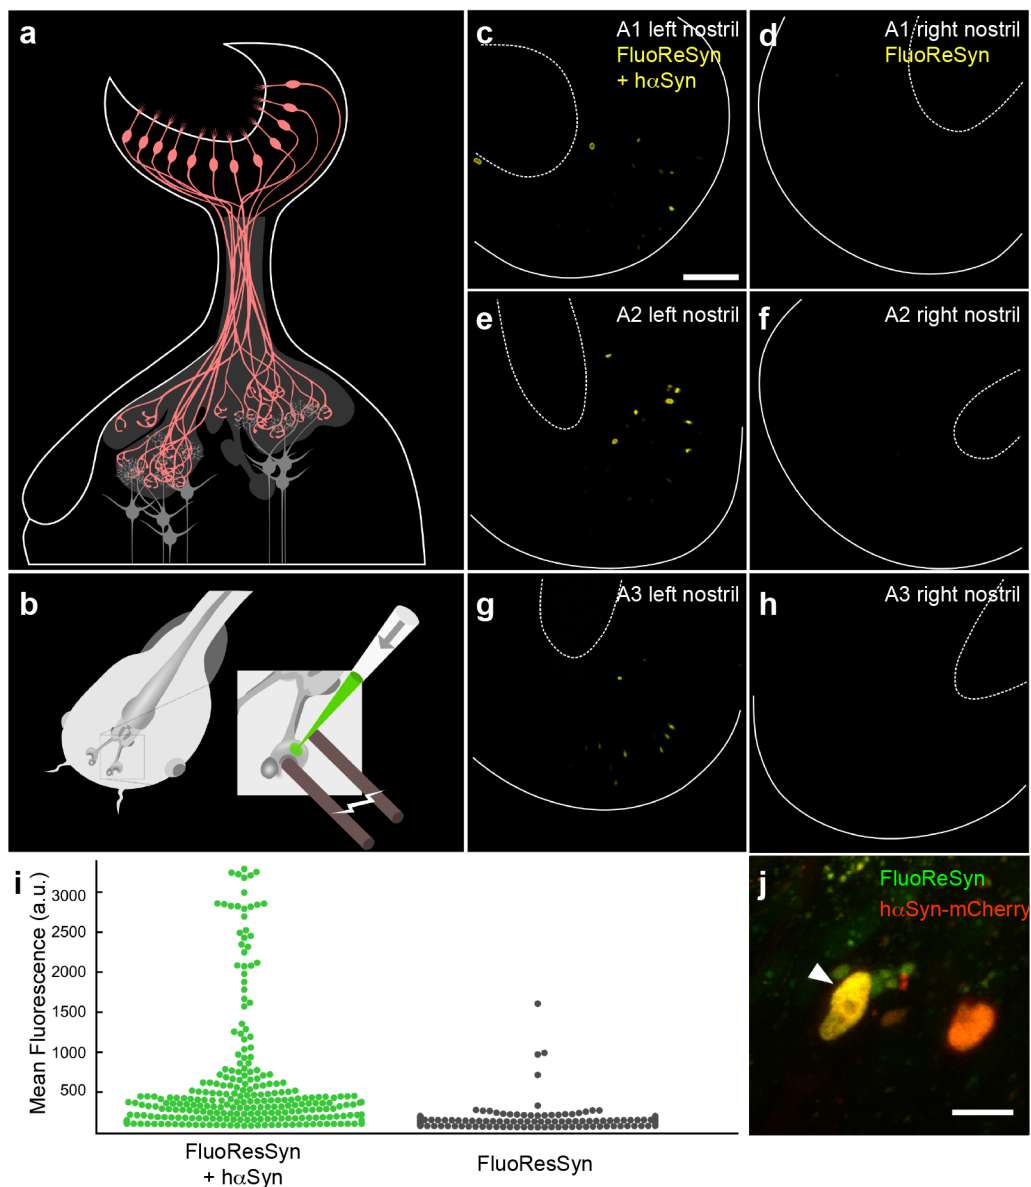

**Figure 3. Verification of the *in vivo* FluoReSyn activity in olfactory neurons of larval *Xenopus laevis*** (a) Organization of the *Xenopus laevis* olfactory system: Olfactory receptor neurons (ORNs; red) residing in the olfactory epithelium project their axons to the olfactory bulb, where they synapse onto the second order projection neurons (grey). (b) Schematic of plasmid electroporation into the olfactory mucosa of anaesthetized *Xenopus laevis* tadpoles. (c, e, g) Left nostrils of three animals (A1-A3) co-electroporated with

FluoReSyn and h $\alpha$ Syn expressing plasmid. (d, f, h) Respective right nostrils electroporated only with FluoReSyn. For all animals and nostrils identical plasmid concentrations and imaging settings were used. Basal and apical delineation of olfactory epithelium indicated by line and dashed line. (i) Distribution of FluoReSyn mean fluorescence intensity of positive nuclei from the left nostrils (FluoReSyn and h $\alpha$ Syn plasmid; green dots) and nuclei from the right nostrils (FluoReSyn plasmid only; black dots). More than 500 nuclei were analyzed from 9 animals imaged *in vivo*. Unpaired student t-test results in  $p < 0.0001$  (\*\*\*\*). (j) High magnification example of a neuron co-expressing FluoReSyn (green) and h $\alpha$ Syn-mCherry (red) resulting in nuclear colocalization (yellow) of both proteins.

### **The specificity of the FluoReSyn for h $\alpha$ Syn.**

As a next step, we assessed whether FluoReSyn binds specifically to human  $\alpha$ Syn or has an affinity towards other synuclein species. For this purpose, Reporter-cells were transiently transfected with plasmids encoding for h $\alpha$ Syn, human  $\beta$ Syn (h $\beta$ Syn) or rat  $\alpha$ Syn (r $\alpha$ Syn). We analyzed the proportion of cells with a positive EGFP signal by epifluorescence microscopy (Figure 4). The expressions of the different synuclein species were controlled by immunostaining with an antibody that recognizes all transfected variants. While no significant differences were observed among the different synuclein species in terms of their expression (Supplementary Figure 3a), only in h $\alpha$ Syn transfected Reporter-cells a substantial proportion of the cells were positive for the FluoReSyn signal (Figure 4b). This result, therefore, proposes that FluoReSyn binds primarily to human  $\alpha$ Syn. It is important to note that the epitope sequence of the h $\alpha$ Syn recognized by NbSny87 has a great identity with the r $\alpha$ Syn sequence with the epitopes differing from each other only by two residues (Supplementary Figure 3b). It is noteworthy, that FluoReSyn seems to bind with higher affinity to Rpn10 than to the r $\alpha$ Syn.



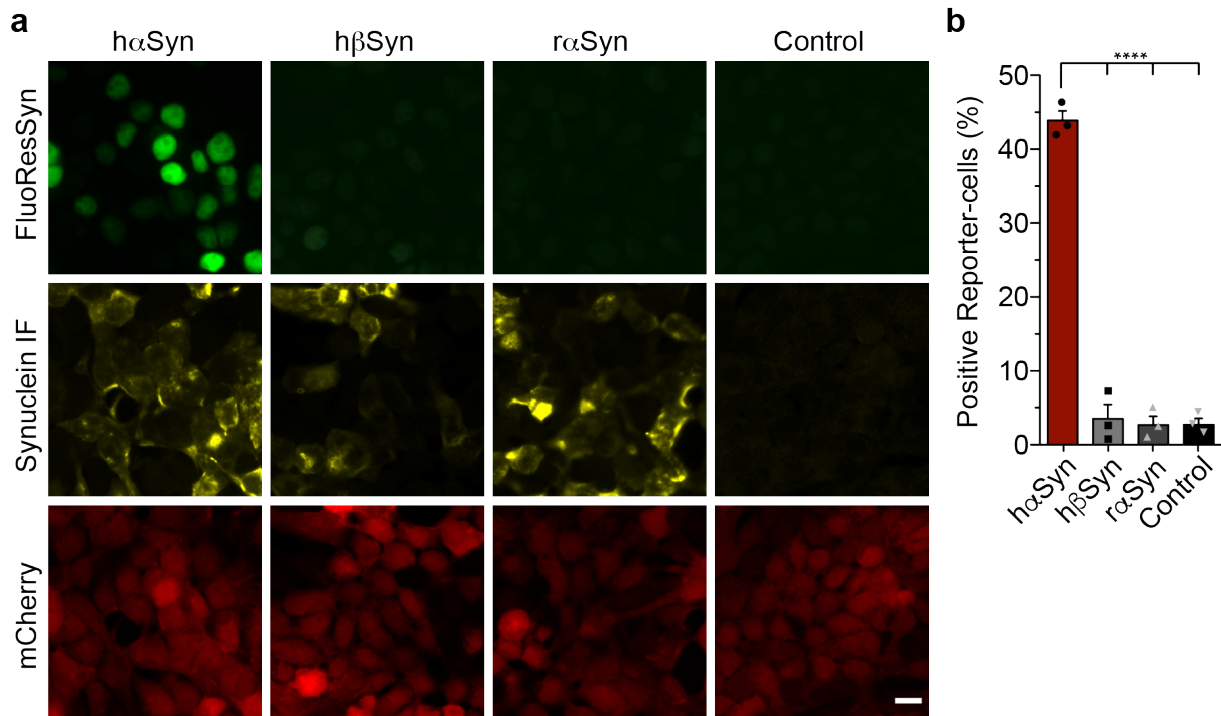

**Figure 4. The FluoReSyn is a specific sensor for human  $\alpha$ Syn.** (a) Equally-scaled representative epifluorescence images of Reporter-cells transfected with h $\alpha$ Syn, h $\beta$ Syn or r $\alpha$ Syn expression constructs. (b) Quantification of the proportion of EGFP-positive cells. Per replication and condition more than 6,000 cells were analyzed, \*\*\*\* $p < 0.0001$ .

### Detection of h $\alpha$ Syn uptake from the culture medium by Reporter-cells

In relation to the pathological  $\alpha$ Syn transmission phenomenon<sup>11</sup>, we evaluated the ability of FluoReSyn to report the entry of foreign h $\alpha$ Syn into the cellular cytosol. For this purpose, purified recombinant h $\alpha$ Syn was administered to the culture mediums of induced Reporter-cells either on its own or in a mixed state with a cationic liposome reagent (i.e. RNAiMAX) to enhance the protein uptake as suggested previously<sup>74,75</sup>. We observed that, if h $\alpha$ Syn was associated with RNAiMAX, it manages to get into the cytosol and stabilize FluoReSyn as evidenced by the accumulated EGFP signal in the nucleus (Figure 5). On the other hand, administrating h $\beta$ Syn associated with RNAiMAX or just naked h $\alpha$ Syn generated only background levels (i.e. induced Reporter-cells not exposed to anything) of EGFP-positive cells, which suggests that h $\alpha$ Syn on its own failed to go across the cell plasma membrane efficiently.

Subsequently, we set up a co-culture of Reporter-cells and HEK293 cells stably expressing untagged and wildtype h $\alpha$ Syn under an inducible promotor (TetON-h $\alpha$ Syn cells; Supplementary Figure 4) to investigate if mammalian produced h $\alpha$ Syn was able to leave the cells and then enter into the neighboring Reporter-cells. As a control condition, Reporter-cells were co-cultured with wild type HEK293 cells which lack

endogenous h $\alpha$ Syn expression. The analysis of co-cultures maintained for 2 to 5 days revealed no significant differences between the test and control groups failing to confirm the occurrence of any h $\alpha$ Syn transmission events between the h $\alpha$ Syn producing cells and the Reporter-cells (Supplementary Figure 5).

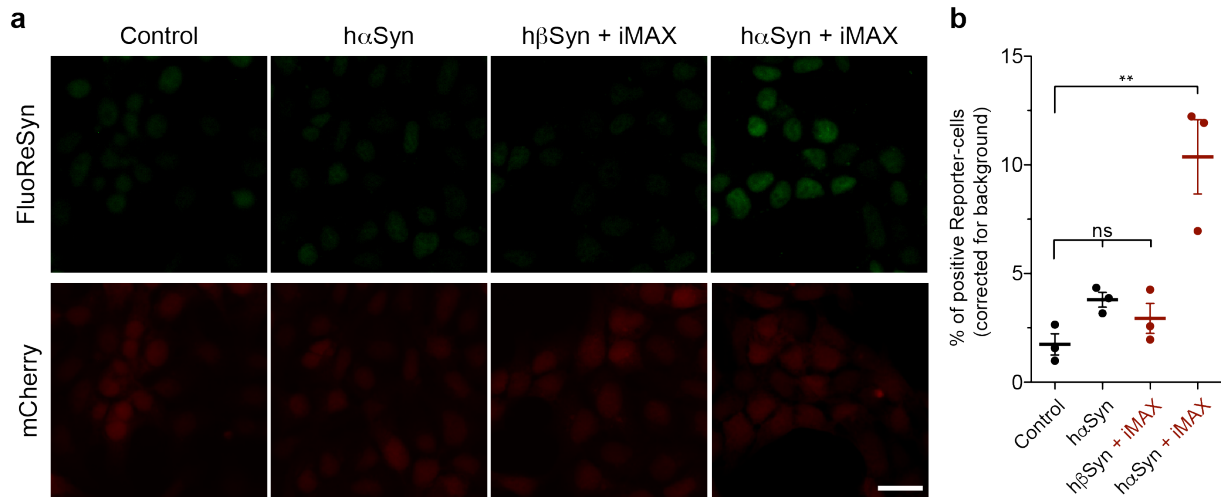

**Figure 5. Transmission of recombinant h $\alpha$ Syn into Reporter-cells.** (a) Equally-scaled representative epifluorescence images of Reporter-cells after incubation for 14 h with recombinant h $\alpha$ Syn monomers added to the culture medium. Monomers were either administered alone (h $\alpha$ Syn) or pre-mixed with the commercial cationic lipid mixture RNAiMAX (h $\alpha$ Syn + iMAX). h $\beta$ Syn + iMAX was used as negative control. (b) Quantification of the percentage of EGFP-positive Reporter-cells. Per replication and condition more than 2,300 cells were analyzed, \*\* $p$ <0.01.

### Detection of h $\alpha$ Syn uptake from the culture medium by primary rat hippocampal neurons

As a next step, we assessed the functionality of FluoReSyn in neurons by investigating whether it can report transmission of h $\alpha$ Syn in primary neuronal cultures. For this purpose, we prepared rat hippocampal neuron cultures and infected them at DIV ~14 with an adeno-associated virus (AAV) encoding for NbSyn87-mCherry-NLS (a red version of FluoReSyn). Here, we decided to administer both the monomeric and fibrillar<sup>76</sup> forms of h $\alpha$ Syn extracellularly to the culture medium of FluoReSyn-transduced hippocampal neurons. The analysis suggested that naked monomeric h $\alpha$ Syn can reach the cytosol of neurons and produce a detectable FluoReSyn signal in their nuclei (Figure 6a, b). This was in contrast to the h $\alpha$ Syn fibrils which failed to induce FluoReSyn signals above that of the control neurons (Figure 6b).

Based on our previous observations with the Reporter-cell line, we also administered the synuclein species pre-mixed with the cationic lipid RNAiMAX (Figure 6a, c). The



results revealed a higher proportion of neurons with FluoReSyn positive-nuclei when h $\alpha$ Syn monomers were pre-mixed with RNAiMAX and added to the culture medium (Figure 6a, c). It was interesting to observe that both, the naked monomers (Figure 6b) and those complexed with lipids (Figure 6c) are able to go across the neuron plasma membranes. This is clearly different to the HEK293-based Reporter-cells which displayed internalization of h $\alpha$ Syn only when complexed to cationic lipids (Figure 5b).

Utilization of liposomal vehicles did not influence the outcome for fibrils and similar to the previous observation with uncoated fibrils (Figure 6b), no FluoReSyn signal was detected in neurons exposed to RNAiMAX-h $\alpha$ Syn fibril complexes (Figure 6c). Importantly, we confirmed that NbSyn87 can bind our h $\alpha$ Syn fibrils<sup>54</sup>, thereby excluding that the negative observations were merely an outcome of FluoReSyn's inability to detect our fibrils (Figure 6d).

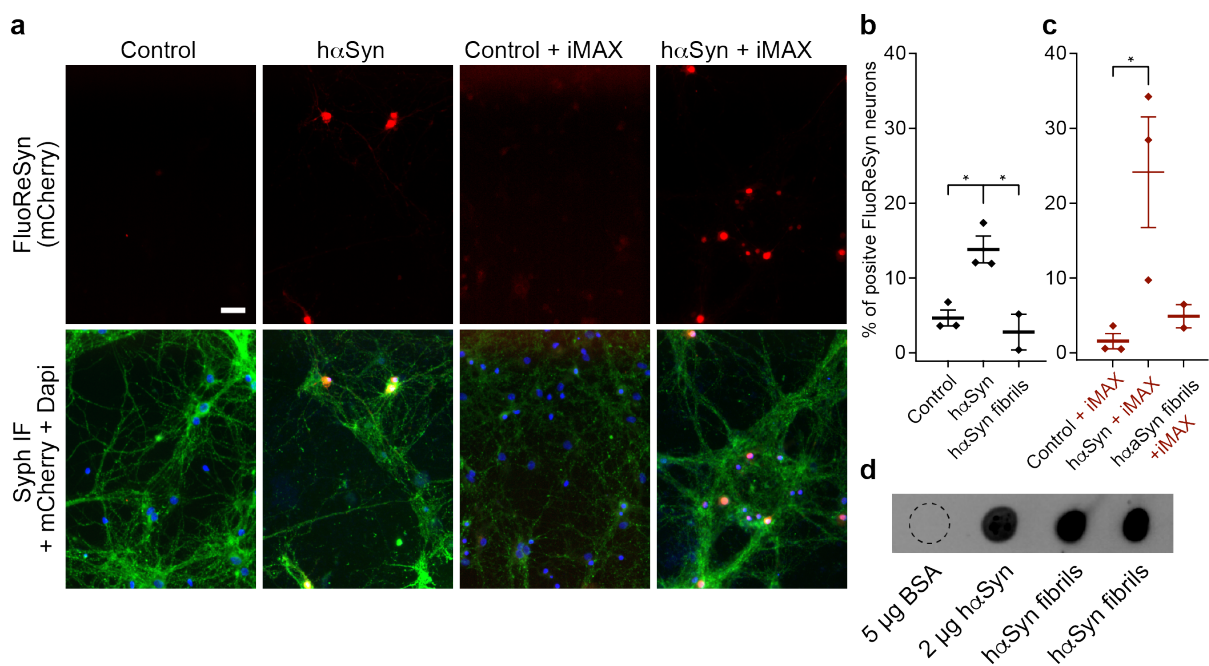

**Figure 6. FluoReSyn reveals the entry of h $\alpha$ Syn monomers into primary rat hippocampal neurons.** (a) Equally-scaled, representative images of primary rat hippocampal neurons infected with adeno-associated virus encoding for NbSyn87-mCherry-NLS (a red version of the FluoReSyn) and exposed 6 days after the AAV transduction to monomeric h $\alpha$ Syn protein with or without RNAiMAX for 14 h. Immunofluorescence against synaptophysin was used as a neuronal marker (Syph IF, green signal). The negative controls were neurons receiving OptiMEM with or without RNAiMAX. (b, c) Quantification of FluoReSyn signal-positive neurons,  $*p < 0.05$ . (d) Monomeric h $\alpha$ Syn and two different batches of fibrils were spotted on a nitrocellulose membrane and detected by NbSyn87-Alexa647 which confirmed the ability of NbSyn87 to bind the hereby employed batch of fibrils. Bovine serum albumin (BSA) was used as negative control.

## Detection of hαSyn in CSF samples

Confident that FluoReSyn can reliably report cytosolic hαSyn, we decided to evaluate the ability of the Reporter-cells to detect hαSyn species in human originated biological samples. The main rationale here was to explore the potential usability of this cellular system for future diagnostic purposes. Therefore, we exposed induced Reporter-cells cultured on a 96-well plate, to CSF samples from 42 individuals diagnosed with variable neurological disorders, that were unrelated to αSyn aggregation disorders. Reporter-cells not exposed to CSF, as well as wildtype HEK293 cells exposed and not exposed to CSF, were used as negative controls. Cells were fixed 24 h post treatment and dozens of images of randomized and non-overlapping locations were automatically acquired per well (Figure 7a). Data analysis showed a small but clear trend of positive Reporter-cells that were incubated with human CSF (Figure 7b). As controls, Reporter-cells not exposed to CSF or wildtype HEK293 cells (not producing any FluoReSyn chimera) incubated with or without CSF, all displayed background levels of positive signal (Figure 7b). This observation reassured that the small percentage of positive Reporter-cells observed upon CSF exposure is a specific and trustworthy response to some forms of hαSyn present in human CSF that can reach the cytosol of our model Reporter-cells. Altogether, this result not only suggests that human CSF may indeed contain a transmittable form of αSyn that is capable of entering into cells but also opens the possibility to optimize this system for generating a unique cell-based diagnostic tool for αSyn-associated disorders.

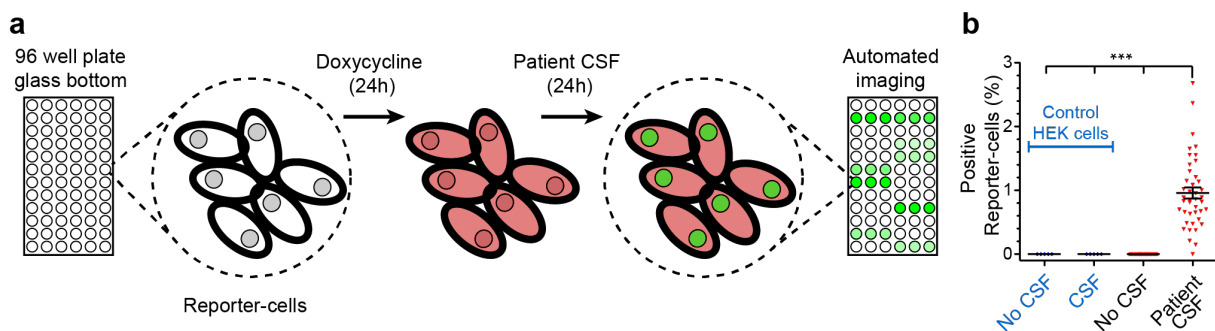

**Figure 7. Detection of transmittable hαSyn from human CSF samples.** (a) Illustration of the experimental set-up. Reporter-cells or wildtype HEK293 cells (control), were seeded onto glass bottom 96-well plates. FluoReSyn expression was induced by doxycycline for 24 h before they were exposed to human CSF or culture medium (control) for another 24 h. Finally, cells were fixed and ~20 images of random and not overlapping locations were acquired automatically per well. The CSF from each patient was used at least in 3 different

wells. (b) Quantification of cells with positive FluoReSyn signal. In total, results represent data from 126 wells of Reporter-cells receiving CSF samples from 42 individuals in technical triplicates, 102 negative control wells with Reporter-cells receiving culture medium, 15 wells of HEK293 cells receiving CSF samples from 5 individuals in technical triplicates and 36 wells of HEK293 cells receiving culture medium, \*\*\* $p < 0.001$ .

## DISCUSSION

Here we present for the first time a unique feature of the NbSyn87, namely, its natural tendency to bind to the proteasomal subunit Rpn10 that leads to its own degradation and eventual clearance from the cell cytoplasm in the absence of hαSyn. This special feature allowed us to develop FluoReSyn, the nanobody based fluorescent reporter for hαSyn, which is capable of detecting the presence or absence of hαSyn in the cellular cytoplasm. Furthermore, our Reporter-cells stably expressing FluoReSyn were able to detect a transmittable form of hαSyn present in human CSF.

Uptake of toxic αSyn species by cells and their subsequent intracellular trafficking is a crucial part of the proposed αSyn transmission pathology<sup>27</sup>. Accordingly, we first characterized and assessed the potential of FluoReSyn Reporter-cells to be used as a research tool for investigating the transmission phenomenon. Our results after introducing recombinant αSyn to the culture medium suggested that the Reporter-cells could reliably report the uptake of extracellular αSyn. Similar to other reports<sup>75,77,78</sup>, we did not detect direct cytoplasmic internalization of naked monomeric hαSyn by the Reporter-cells (derived from HEK293 cells). We rather observed that the cytosolic uptake required assistance with lipid-based elements as also had been shown in other studies<sup>75,78</sup>. Different from the HEK-based Reporter-cells, we observed that entry of naked recombinant αSyn monomers into primary neurons expressing FluoReSyn is more likely to occur, and lipid-based facilitating agents like the RNAiMAX make the entry process even more efficient. These observations expose the influence of the cellular context on the translocation of αSyn from the extracellular to the intracellular space (e.g. requirement of distinct receptor interactions or membrane translocators for αSyn<sup>27</sup>) and can be interpreted as a reflection of the neuronal nature of αSyn transmission pathology. In line with this interpretation, we did not observe a transmission event when HEK293-based cells stably transfected with hαSyn were co-cultured with the Reporter-cells. On the other

hand, these transmission events might be highly dependent on the concentration of h $\alpha$ Syn and duration of exposure. With our set-up we could not employ higher concentrations of h $\alpha$ Syn in order to avoid toxic effects to the cells and furthermore, we were limited in terms of exposure durations as a longer maintenance of dividing cells in culture became difficult after several days.

In the current study, we were unable to detect any fibril entry to the cytosol of FluoReSyn transduced neurons, suggesting that while monomers might pass directly through the plasma membrane, the uptake of larger arrangements like oligomers, fibrils or aggregated  $\alpha$ Syn might be mediated by regular endocytosis<sup>27,30,79</sup>. In this case, FluoReSyn would not detect compartmentalized  $\alpha$ Syn in endocytosed vesicles unless  $\alpha$ Syn finds a way to escape into the cytosol. In line with our observations, it has been recently shown that  $\alpha$ Syn fibrils that were internalized by cultured primary neurons remained confined to endo-lysosomal compartments up to seven days without a major escape from the endocytic pathway<sup>80</sup>. On the other hand, it is known that preparation and incubation conditions (e.g. pH, salinity, temperature, presence of modulators) have profound influence on the end-conformation and morphology of recombinant fibrils<sup>62</sup>. This variability probably also propagates to different *in vitro* and *in vivo* functional properties<sup>25,81</sup>. Therefore, it may as well be that the observations in the current study are attributable to the distinct properties of the hereby employed  $\alpha$ Syn fibrils or culture conditions.

Our results demonstrated that the FluoReSyn works both in a cell line and primary neurons, and can report the uptake of untagged  $\alpha$ Syn. Introducing recombinant or tissue derived  $\alpha$ Syn extracellularly to *in vitro* cell cultures is a common approach for investigating the internalization and subsequent seeding activities of  $\alpha$ Syn in the context of transmission paradigm<sup>31,32,82</sup>. However, the readily available cellular models and tools are generally limited in terms of offering an unambiguous and spatially resolved discernment of internalized  $\alpha$ Syn from the extracellularly applied  $\alpha$ Syn seeds<sup>80</sup>. Therefore, there is a necessity to develop novel tools that would enable selective visualization of internalized  $\alpha$ Syn and deliver a quantitative characterization of  $\alpha$ Syn uptake phenomenon<sup>80</sup>. In a recent study where neuronal cultures were exposed to GFP-labeled  $\alpha$ Syn fibrils, a membrane-impermeable fluorescence quencher dye was used to exclusively quench the fluorescence of extracellular fibrils thus enabling the selective imaging of only internalized seeds<sup>80</sup>. Similarly, we propose that, FluoReSyn is an optimal tool for this purpose as it can

exclusively detect cytosolic  $\alpha$ Syn. Furthermore, our approach avoids the necessity of employing tagged or covalently-conjugated forms of  $\alpha$ Syn which as discussed previously may not recapitulate the normal behavior of native, untagged  $\alpha$ Syn.

Our data suggest that FluoReSyn is a useful research tool not only for neuronal cultures, but also for *in vivo* set-ups, the ease of its use shown by our experiments in *Xenopus Laevis*. Besides, the FluoReSyn's specificity to h $\alpha$ Syn would be of advantage when studying h $\alpha$ Syn transmission in animal models (e.g. mice, rat) as any interference from endogenous  $\alpha$ Syn present in rodents can be avoided.

As a next step in further characterizing the cellular reporter system, we evaluated its ability to detect human-originated  $\alpha$ Syn with the future perspective of developing it further into a diagnostic tool<sup>83-86</sup>. Here, we used CSF samples from a readily available cohort of individuals (42). The results showed that our Reporter-cells could indeed detect specific species of  $\alpha$ Syn in human CSF which are able to enter into their cytoplasm. Considering our observations with recombinant  $\alpha$ Syn monomers that required a lipid coating agent for entering the Reporter-cells, it is plausible that the  $\alpha$ Syn molecules we detected in CSF samples were in vesicular structures such as exosomes as already suggested by others<sup>87,88</sup>, or were species other than monomers, such as oligomers with different means of entering the cells<sup>89-92</sup>.

The presence of  $\alpha$ Syn in CSF can be measured biochemically, and many efforts have been directed at developing assays for detection of CSF-originated  $\alpha$ Syn as a biomarker<sup>93-95</sup>. It is important to emphasize that our system provides extra information by detecting h $\alpha$ Syn forms that are able to get into the cytosol of cells. Therefore, it is plausible that we are detecting the species that are more prone to transmission related pathology. This is particularly relevant in the light of emerging evidence which suggests that particular species of  $\alpha$ Syn (e.g. oligomers, aggregates) that are associated with toxicity can serve as far-better biomarkers than total  $\alpha$ Syn in CSF<sup>94</sup>.

Based on our initial results, showing that the FluoReSyn signal strength is determined by the amount of  $\alpha$ Syn, it is reasonable to presume that the variable EGFP signal intensities in the CSF analysis reflect the inter-individual differences in physiological  $\alpha$ Syn concentrations of the study participants. This was a fascinating first proof-of-concept and to the best of our knowledge, our cellular h $\alpha$ Syn Reporter set-up is so-far the sole approach developed for detection of transmittable h $\alpha$ Syn species in human body fluids. We believe that major optimizations can be performed



to the hereby presented system (e.g. using a faster maturing and brighter EGFP variant, tuning biochemically the FluoReSyn sensitivity, destabilizing the antigen unbound NbSyn87<sup>96</sup> and generating a neuron-based Reporter-cells) to achieve quantitatively more sensitive read-outs which would in turn pave the way for development of an accurate and reliable diagnostic or prognostic tool for  $\alpha$ -synuclein aggregation disorders.

### **Acknowledgments**

FO, BB, IM and TO were supported by the *Deutsche Forschungsgemeinschaft* (DFG) through Cluster of Excellence Nanoscale Microscopy and Molecular Physiology of the Brain (CNMPB). We thank Dr. Sebastian Kügler for generating and providing us the AAVs used in this work. We thank Karin Giller, Melanie Wegstroth, Christina Schäfer and Nicole Hartelt for excellent technical help.

### **Author contributions**

CG, TO and EFF designed and conducted experiments, analyzed and interpreted data, contributed to the writing of the manuscript. NWAal and HV designed and performed experiments, analyzed and interpreted data. NWender initially characterized the sensor, designed reporter cell lines, designed and perform experiments, analyzed and interpreted data. IM contributed to the interpretation of data and scientific discussions. CT and BM provided human CSF samples. TS, MZ and SB prepared and provided  $\alpha$ -Syn fibrils. SOR analyzed and interpreted the data, contributed to the supervision of the study and scientific discussions. BB designed and performed experiments, analyzed and interpreted the data, supervised the study and wrote the manuscript. FO conceived the project, designed and performed experiments, analyzed and interpreted the data, supervised the study and wrote the manuscript.

### **REFERENCES**

1. Galvin JE, Lee VMY, Trojanowski JQ. Synucleinopathies: Clinical and pathological implications. *Arch Neurol.* 2001;58(2):186-190. doi:10.1001/archneur.58.2.186
2. SPILLANTINI MG, GOEDERT M. The  $\alpha$ -Synucleinopathies: Parkinson's Disease, Dementia with Lewy Bodies, and Multiple System Atrophy. *Ann N Y Acad Sci.* 2006;920(1):16-27. doi:10.1111/j.1749-6632.2000.tb06900.x
3. Jakes R, Spillantini MG, Goedert M. Identification of two distinct synucleins from human

- brain. *FEBS Lett.* 1994;345(1):27-32. doi:10.1016/0014-5793(94)00395-5
4. Lautenschläger J, Stephens AD, Fusco G, et al. C-terminal calcium binding of  $\alpha$ -synuclein modulates synaptic vesicle interaction. *Nat Commun.* 2018;9(1):712. doi:10.1038/s41467-018-03111-4
  5. Burre J, Sharma M, Tsetsenis T, Buchman V, Etherton MR, Südhof TC.  $\alpha$ -Synuclein Promotes SNARE-Complex Assembly in Vivo and in Vitro. *Science (80- )*. 2010;329(5999):1663-1667. doi:10.1126/science.1195227
  6. Rodriguez-Araujo G, Nakagami H, Hayashi H, et al. Alpha-synuclein elicits glucose uptake and utilization in adipocytes through the Gab1/PI3K/Akt transduction pathway. *Cell Mol Life Sci.* 2013;70(6):1123-1133. doi:10.1007/s00018-012-1198-8
  7. Hashimoto M, Hsu LJ, Rockenstein E, Takenouchi T, Mallory M, Masliah E.  $\alpha$ -Synuclein protects against oxidative stress via inactivation of the c-Jun N-terminal kinase stress-signaling pathway in neuronal cells. *J Biol Chem.* 2002;277(13):11465-11472. doi:10.1074/jbc.M111428200
  8. Ahn M, Kim S, Kang M, Ryu Y, Kim TD. Chaperone-like activities of alpha-synuclein: alpha-synuclein assists enzyme activities of esterases. *Biochem Biophys Res Commun.* 2006;346(4):1142-1149. doi:10.1016/j.bbrc.2006.05.213
  9. Jin H, Kanthasamy A, Ghosh A, Yang Y, Anantharam V, Kanthasamy AG.  $\alpha$ -Synuclein negatively regulates protein kinase C $\delta$  expression to suppress apoptosis in dopaminergic neurons by reducing p300 histone acetyltransferase activity. *J Neurosci.* 2011;31(6):2035-2051. doi:10.1523/JNEUROSCI.5634-10.2011
  10. Burré J, Sharma M, Südhof TC.  $\alpha$ -Synuclein assembles into higher-order multimers upon membrane binding to promote SNARE complex formation. *Proc Natl Acad Sci.* 2014;111(40):E4274-E4283. doi:10.1073/pnas.1416598111
  11. Karpowicz RJ, Trojanowski JQ, Lee VM-Y. Transmission of  $\alpha$ -synuclein seeds in neurodegenerative disease: recent developments. *Lab Invest.* 2019;99(7):971-981. doi:10.1038/s41374-019-0195-z
  12. Burré J, Vivona S, Diao J, Sharma M, Brunger AT, Südhof TC. Properties of native brain  $\alpha$ -synuclein. *Nature.* 2013;498(7453):E4-E6. doi:10.1038/nature12125
  13. Bartels T, Choi JG, Selkoe DJ.  $\alpha$ -Synuclein occurs physiologically as a helically folded tetramer that resists aggregation. *Nature.* 2011;477(7362):107-110. doi:10.1038/nature10324
  14. Fink AL. The Aggregation and Fibrillation of  $\alpha$ -Synuclein. *Acc Chem Res.* 2006;39(9):628-634. doi:10.1021/ar050073t
  15. Mehra S, Sahay S, Maji SK.  $\alpha$ -Synuclein misfolding and aggregation: Implications in Parkinson's disease pathogenesis. *Biochim Biophys Acta - Proteins Proteomics.* 2019. doi:10.1016/j.bbapap.2019.03.001
  16. Opazo F, Krenz A, Heermann S, Schulz JB, Falkenburger BH. Accumulation and clearance of  $\alpha$ -synuclein aggregates demonstrated by time-lapse imaging. *J Neurochem.* 2008;106(2):529-540. doi:10.1111/j.1471-4159.2008.05407.x
  17. Li J-Y, Englund E, Holton JL, et al. Lewy bodies in grafted neurons in subjects with Parkinson's disease suggest host-to-graft disease propagation. *Nat Med.* 2008;14(5):501-503. doi:10.1038/nm1746
  18. Desplats P, Lee H-J, Bae E-J, et al. Inclusion formation and neuronal cell death through neuron-to-neuron transmission of  $\alpha$ -synuclein. *Proc Natl Acad Sci.* 2009;106(31):13010-13015. doi:10.1073/pnas.0903691106
  19. Luk KC, Kehm V, Carroll J, et al. Pathological  $\alpha$ -synuclein transmission initiates Parkinson-like neurodegeneration in nontransgenic mice. *Science.* 2012;338(6109):949-



953. doi:10.1126/science.1227157
20. Recasens A, Ulusoy A, Kahle PJ, Di Monte DA, Dehay B. In vivo models of alpha-synuclein transmission and propagation. *Cell Tissue Res.* 2018;373(1):183-193. doi:10.1007/s00441-017-2730-9
  21. Marvian AT, Koss DJ, Aliakbari F, Morshedi D, Outeiro TF. In vitro models of synucleinopathies: informing on molecular mechanisms and protective strategies. *J Neurochem.* April 2019:jnc.14707. doi:10.1111/jnc.14707
  22. Masuda-Suzukake M, Nonaka T, Hosokawa M, et al. Prion-like spreading of pathological  $\alpha$ -synuclein in brain. *Brain.* 2013. doi:10.1093/brain/awt037
  23. Brundin P, Melki R. Prying into the Prion Hypothesis for Parkinson's Disease. *J Neurosci.* 2017. doi:10.1523/jneurosci.1788-16.2017
  24. Pieri L, Madiona K, Bousset L, Melki R. Fibrillar  $\alpha$ -synuclein and huntingtin exon 1 assemblies are toxic to the cells. *Biophys J.* 2012. doi:10.1016/j.bpj.2012.04.050
  25. Peelaerts W, Bousset L, Van der Perren A, et al.  $\alpha$ -Synuclein strains cause distinct synucleinopathies after local and systemic administration. *Nature.* 2015;522(7556):340-344. doi:10.1038/nature14547
  26. Pieri L, Madiona K, Melki R. Structural and functional properties of prefibrillar  $\alpha$ -synuclein oligomers. *Sci Rep.* 2016. doi:10.1038/srep24526
  27. Grozdanov V, Danzer KM. Release and uptake of pathologic alpha-synuclein. *Cell Tissue Res.* 2018. doi:10.1007/s00441-017-2775-9
  28. Vekrellis K, Xilouri M, Emmanouilidou E, Rideout HJ, Stefanis L. Pathological roles of  $\alpha$ -synuclein in neurological disorders. *Lancet Neurol.* 2011. doi:10.1016/S1474-4422(11)70213-7
  29. Dawson TM, Dawson VL. Molecular Pathways of Neurodegeneration in Parkinson's Disease. *Science (80- ).* 2003. doi:10.1126/science.1087753
  30. Lee HJ, Suk JE, Bae EJ, Lee JH, Paik SR, Lee SJ. Assembly-dependent endocytosis and clearance of extracellular  $\alpha$ -synuclein. *Int J Biochem Cell Biol.* 2008. doi:10.1016/j.biocel.2008.01.017
  31. Holmes BB, DeVos SL, Kfoury N, et al. Heparan sulfate proteoglycans mediate internalization and propagation of specific proteopathic seeds. *Proc Natl Acad Sci U S A.* 2013;110(33). doi:10.1073/pnas.1301440110
  32. Freundt EC, Maynard N, Clancy EK, et al. Neuron-to-neuron transmission of  $\alpha$ -synuclein fibrils through axonal transport. *Ann Neurol.* 2012;72(4):517-524. doi:10.1002/ana.23747
  33. Klucken J, Outeiro TF, Nguyen P, McLean PJ, Hyman BT. Detection of novel intracellular  $\alpha$ -synuclein oligomeric species by fluorescence lifetime imaging. *FASEB J.* 2006;20(12):2050-2057. doi:10.1096/fj.05-5422com
  34. Prusiner SB, Woerman AL, Mordes DA, et al. Evidence for  $\alpha$ -synuclein prions causing multiple system atrophy in humans with parkinsonism. *Proc Natl Acad Sci U S A.* 2015;112(38):E5308-E5317. doi:10.1073/pnas.1514475112
  35. Hansen C, Angot E, Bergström AL, et al.  $\alpha$ -Synuclein propagates from mouse brain to grafted dopaminergic neurons and seeds aggregation in cultured human cells. *J Clin Invest.* 2011;121(2):715-725. doi:10.1172/JCI43366
  36. Hansen C, Björklund T, Petit GH, et al. A novel  $\alpha$ -synuclein-GFP mouse model displays progressive motor impairment, olfactory dysfunction and accumulation of  $\alpha$ -synuclein-GFP. *Neurobiol Dis.* 2013;56:145-155. doi:10.1016/j.nbd.2013.04.017
  37. Outeiro TF, Putcha P, Tetzlaff JE, et al. Formation of toxic oligomeric  $\alpha$ -synuclein species in living cells. *PLoS One.* 2008;3(4). doi:10.1371/journal.pone.0001867

38. Jiang P, Gan M, Yen SH, McLean PJ, Dickson DW. Impaired endo-lysosomal membrane integrity accelerates the seeding progression of  $\alpha$ -synuclein aggregates. *Sci Rep.* 2017;7(1). doi:10.1038/s41598-017-08149-w
39. Bae E-J, Yang N-Y, Song M, et al. Glucocerebrosidase regulates perpetual cell-to-cell transmission of  $\alpha$ -synuclein. *Nat Commun.* 2015;4(5):547-566. doi:10.1002/wrna.1178.Alternative
40. Woerman AL, Stöhr J, Aoyagi A, et al. Propagation of prions causing synucleinopathies in cultured cells. *Proc Natl Acad Sci U S A.* 2015;112(35):E4949-E4958. doi:10.1073/pnas.1513426112
41. Stadler C, Rexhepaj E, Singan VR, et al. Immunofluorescence and fluorescent-protein tagging show high correlation for protein localization in mammalian cells. *Nat Methods.* 2013;10(4):315-323. doi:10.1038/nmeth.2377
42. Hughes LD, Rawle RJ, Boxer SG. Choose your label wisely: Water-soluble fluorophores often interact with lipid bilayers. *PLoS One.* 2014;9(2). doi:10.1371/journal.pone.0087649
43. Ugalde CL, Lawson VA, Finkelstein DI, Hill AF. The role of lipids in  $\alpha$ -synuclein misfolding and neurotoxicity. *J Biol Chem.* 2019. doi:10.1074/jbc.REV119.007500
44. Luk KC, Kehm VM, Zhang B, O'Brien P, Trojanowski JQ, Lee VMY. Intracerebral inoculation of pathological  $\alpha$ -synuclein initiates a rapidly progressive neurodegenerative  $\alpha$ -synucleinopathy in mice. *J Exp Med.* 2012. doi:10.1084/jem.20112457
45. Rey NL, George S, Brundin P. Spreading the word: Precise animal models and validated methods are vital when evaluating prion-like behaviour of alpha-synuclein. *Neuropathol Appl Neurobiol.* 2016. doi:10.1111/nan.12299
46. De Genst E, Messer A, Dobson CM. Antibodies and protein misfolding: From structural research tools to therapeutic strategies. *Biochim Biophys Acta - Proteins Proteomics.* 2014. doi:10.1016/j.bbapap.2014.08.016
47. Vaikath NN, Hmila I, Gupta V, Erskine D, Ingelsson M, El-Agnaf OMA. Antibodies against alpha-synuclein: tools and therapies. *J Neurochem.* May 2019;jnc.14713. doi:10.1111/jnc.14713
48. Muyldermans S. Nanobodies: Natural Single-Domain Antibodies. *Annu Rev Biochem.* 2013;82(1):775-797. doi:10.1146/annurev-biochem-063011-092449
49. Maidorn M, Olichon A, Rizzoli SO, Opazo F. Nanobodies reveal an extra-synaptic population of SNAP-25 and Syntaxin 1A in hippocampal neurons. *MAbs.* 2019;11(2):305-321. doi:10.1080/19420862.2018.1551675
50. Götzke H, Kilisch M, Martínez-Carranza M, et al. The ALFA-tag is a highly versatile tool for nanobody-based bioscience applications. *Nat Commun.* 2019;10(1). doi:10.1038/s41467-019-12301-7
51. Steeland S, Vandenbroucke RE, Libert C. Nanobodies as therapeutics: big opportunities for small antibodies. *Drug Discov Today.* 2016;21(7):1076-1113. doi:10.1016/j.drudis.2016.04.003
52. Caussin E, Kanca O, Affolter M. Fluorescent fusion protein knockout mediated by anti-GFP nanobody. *Nat Struct Mol Biol.* 2012;19(1):117-122. doi:10.1038/nsmb.2180
53. Vuchelen A, O'Day E, De Genst E, et al. (1)H, (13)C and (15)N assignments of a camelid nanobody directed against human alpha-synuclein. *Biomol NMR Assign.* 2009;3(2):231-233. doi:10.1007/s12104-009-9182-4
54. Williams T, El-Turk F, Buell AK, et al. Nanobodies raised against monomeric  $\alpha$ -synuclein distinguish between fibrils at different maturation stages. *J Mol Biol.* 2013;425(14):2397-2411. doi:10.1016/j.jmb.2013.01.040

55. El-Turk F, Newby FN, De Genst E, et al. Structural Effects of Two Camelid Nanobodies Directed to Distinct C-Terminal Epitopes on  $\alpha$ -Synuclein. *Biochemistry*. 2016;55(22):3116-3122. doi:10.1021/acs.biochem.6b00149
56. El Turk F, De Genst E, Guilliams T, et al. Exploring the role of post-translational modifications in regulating  $\alpha$ -synuclein interactions by studying the effects of phosphorylation on nanobody binding. *Protein Sci*. 2018;27(7):1262-1274. doi:10.1002/pro.3412
57. Iljina M, Hong L, Horrocks MH, et al. Nanobodies raised against monomeric  $\alpha$ -synuclein inhibit fibril formation and destabilize toxic oligomeric species. *BMC Biol*. 2017;15(1):57. doi:10.1186/s12915-017-0390-6
58. Butler DC, Joshi SN, Genst E De, Baghel AS, Dobson CM, Messer A. Bifunctional Anti-Non-Amyloid Component  $\alpha$ -Synuclein Nanobodies Are Protective In Situ. Witt SN, ed. *PLoS One*. 2016;11(11):e0165964. doi:10.1371/journal.pone.0165964
59. De Genst EJ, Guilliams T, Wellens J, et al. Structure and properties of a complex of  $\alpha$ -synuclein and a single-domain camelid antibody. *J Mol Biol*. 2010;402(2):326-343. doi:10.1016/j.jmb.2010.07.001
60. Chatterjee D, Bhatt M, Butler D, et al. Proteasome-targeted nanobodies alleviate pathology and functional decline in an  $\alpha$ -synuclein-based Parkinson's disease model. *NPJ Park Dis*. 2018;4(1):25. doi:10.1038/s41531-018-0062-4
61. Haselbach D, Schrader J, Lambrecht F, Henneberg F, Chari A, Stark H. Long-range allosteric regulation of the human 26S proteasome by 20S proteasome-targeting cancer drugs. *Nat Commun*. 2017;8. doi:10.1038/ncomms15578
62. Hoyer W, Antony T, Cherny D, Heim G, Jovin TM, Subramaniam V. Dependence of  $\alpha$ -synuclein aggregate morphology on solution conditions. *J Mol Biol*. 2002. doi:10.1016/S0022-2836(02)00775-1
63. Hoyer W, Cherny D, Subramaniam V, Jovin TM. Impact of the acidic C-terminal region comprising amino acids 109-140 on  $\alpha$ -synuclein aggregation in vitro. *Biochemistry*. 2004;43(51):16233-16242. doi:10.1021/bi048453u
64. Kaech S, Banker G. Culturing hippocampal neurons. *Nat Protoc*. 2006;1(5):2406-2415. doi:10.1038/nprot.2006.356
65. Nieuwkoop P. FJ. *Normal Table of Xenopus Laevis (Daudin): A Systematical & Chronological Survey of the Development from the Fertilized Egg till the End of Metamorphosis.*; 1994. <http://www.xenbase.org/anatomy/alldev.do>.
66. Weiss L, Offner T, Hassenklöver T, Manzini I. Dye electroporation and imaging of calcium signaling in Xenopus nervous system. In: *Methods in Molecular Biology*. Vol 1865. ; 2018:217-231. doi:10.1007/978-1-4939-8784-9\_15
67. Schindelin J, Arganda-Carreras I, Frise E, et al. Fiji: An open-source platform for biological-image analysis. *Nat Methods*. 2012;9(7):676-682. doi:10.1038/nmeth.2019
68. Li C., Lee C. Minimum Cross Entropy Thresholding. *Pattern Recognit*. 1993;26(4):617-625.
69. Altschul SF, Gish W, Miller W, Myers EW, Lipman DJ. Basic local alignment search tool. *J Mol Biol*. 1990. doi:10.1016/S0022-2836(05)80360-2
70. Hamazaki J, Sasaki K, Kawahara H, Hisanaga S -i., Tanaka K, Murata S. Rpn10-Mediated Degradation of Ubiquitinated Proteins Is Essential for Mouse Development. *Mol Cell Biol*. 2007. doi:10.1128/mcb.00509-07
71. Kim JH, Lee SR, Li LH, et al. High cleavage efficiency of a 2A peptide derived from porcine teschovirus-1 in human cell lines, zebrafish and mice. *PLoS One*. 2011. doi:10.1371/journal.pone.0018556

72. Blum M, Ott T. *Xenopus*: An undervalued model organism to study and model human genetic disease. *Cells Tissues Organs*. 2019. doi:10.1159/000490898
73. Haas K, Jensen K, Sin WC, Foa L, Cline HT. Targeted electroporation in *Xenopus* tadpoles in vivo -from single cells to the entire brain. *Differentiation*. 2002;70(4-5):148-154. doi:10.1046/j.1432-0436.2002.700404.x
74. Zuris JA, Thompson DB, Shu Y, et al. Cationic lipid-mediated delivery of proteins enables efficient protein-based genome editing in vitro and in vivo. *Nat Biotechnol*. 2015. doi:10.1038/nbt.3081
75. Luk KC, Song C, O'Brien P, et al. Exogenous  $\alpha$ -synuclein fibrils seed the formation of Lewy body-like intracellular inclusions in cultured cells. *Proc Natl Acad Sci*. 2009. doi:10.1073/pnas.0908005106
76. Karpinar DP, Balija MBG, Kügler S, et al. Pre-fibrillar  $\alpha$ -synuclein variants with impaired B-structure increase neurotoxicity in parkinson's disease models. *EMBO J*. 2009. doi:10.1038/emboj.2009.257
77. Delenclos M, Trendafilova T, Mahesh D, et al. Investigation of endocytic pathways for the internalization of exosome-associated oligomeric alpha-synuclein. *Front Neurosci*. 2017. doi:10.3389/fnins.2017.00172
78. Nonaka T, Watanabe ST, Iwatsubo T, Hasegawa M. Seeded aggregation and toxicity of  $\alpha$ -synuclein and tau: Cellular models of neurodegenerative diseases. *J Biol Chem*. 2010. doi:10.1074/jbc.M110.148460
79. Ahn KJ, Paik SR, Chung KC, Kim J. Amino acid sequence motifs and mechanistic features of the membrane translocation of  $\alpha$ -synuclein. *J Neurochem*. 2006. doi:10.1111/j.1471-4159.2006.03731.x
80. Karpowicz RJ, Haney CM, Mihaila TS, Sandler RM, Petersson EJ, Lee VMY. Selective imaging of internalized proteopathic  $\alpha$ -synuclein seeds in primary neurons reveals mechanistic insight into transmission of synucleinopathies. *J Biol Chem*. 2017. doi:10.1074/jbc.M117.780296
81. Bousset L, Pieri L, Ruiz-Arlandis G, et al. Structural and functional characterization of two alpha-synuclein strains. *Nat Commun*. 2013;4(1):2575. doi:10.1038/ncomms3575
82. Brahic M, Bousset L, Bieri G, Melki R, Gitler AD. Axonal transport and secretion of fibrillar forms of  $\alpha$ -synuclein, A $\beta$ 42 peptide and HTTExon 1. *Acta Neuropathol*. 2016. doi:10.1007/s00401-016-1538-0
83. Rizzo G, Arcuti S, Copetti M, et al. Accuracy of clinical diagnosis of dementia with Lewy bodies: A systematic review and meta-analysis. *J Neurol Neurosurg Psychiatry*. 2018. doi:10.1136/jnnp-2017-316844
84. Rizzo G, Copetti M, Arcuti S, Martino D, Fontana A, Logroscino G. Accuracy of clinical diagnosis of Parkinson disease. *Neurology*. 2016. doi:10.1212/WNL.0000000000002350
85. Jellinger KA. Accuracy of clinical diagnosis of Parkinson disease: A systematic review and meta-analysis. *Neurology*. 2016. doi:10.1212/WNL.0000000000002876
86. Majbour NK, Vaikath NN, Eusebi P, et al. Longitudinal changes in CSF alpha-synuclein species reflect Parkinson's disease progression. *Mov Disord*. 2016. doi:10.1002/mds.26754
87. Stuenkel A, Kunadt M, Kruse N, et al. Induction of  $\alpha$ -synuclein aggregate formation by CSF exosomes from patients with Parkinson's disease and dementia with Lewy bodies. *Brain*. 2016. doi:10.1093/brain/awv346
88. Shi M, Liu C, Cook TJ, et al. Plasma exosomal  $\alpha$ -synuclein is likely CNS-derived and increased in Parkinson's disease. *Acta Neuropathol*. 2014. doi:10.1007/s00401-014-1314-y

89. Tsigelny IF, Sharikov Y, Wrasidlo W, et al. Role of  $\alpha$ -synuclein penetration into the membrane in the mechanisms of oligomer pore formation. *FEBS J.* 2012. doi:10.1111/j.1742-4658.2012.08489.x
90. Volles MJ, Lansbury PT. Vesicle permeabilization by protofibrillar  $\alpha$ -synuclein is sensitive to Parkinson's disease-linked mutations and occurs by a pore-like mechanism. *Biochemistry.* 2002. doi:10.1021/bi0121353
91. Lashuel HA, Hartley D, Petre BM, Walz T, Lansbury PT. Neurodegenerative disease: Amyloid pores from pathogenic mutations. *Nature.* 2002. doi:10.1038/418291a
92. Stöckl M, Claessens MMAE, Subramaniam V. Kinetic measurements give new insights into lipid membrane permeabilization by  $\alpha$ -synuclein oligomers. *Mol Biosyst.* 2012. doi:10.1039/c1mb05293d
93. Maass F, Schulz I, Lingor P, Mollenhauer B, Bähr M. Cerebrospinal fluid biomarker for Parkinson's disease: An overview. *Mol Cell Neurosci.* 2019. doi:10.1016/j.mcn.2018.12.005
94. Parnetti L, Gaetani L, Eusebi P, et al. CSF and blood biomarkers for Parkinson's disease. *Lancet Neurol.* 2019. doi:10.1016/S1474-4422(19)30024-9
95. Eusebi P, Giannandrea D, Biscetti L, et al. Diagnostic utility of cerebrospinal fluid  $\alpha$ -synuclein in Parkinson's disease: A systematic review and meta-analysis. *Mov Disord.* 2017. doi:10.1002/mds.27110
96. Tang JCY, Drokhylyansky E, Etemad B, et al. Detection and manipulation of live antigen-expressing cells using conditionally stable nanobodies. *Elife.* 2016;5(MAY2016). doi:10.7554/eLife.15312
